# Supplementary material for: Molecular Profiling Reveals Involvement of ESCO2 in Intermediate Progenitor Cell Maintenance in the Developing Mouse Cortex
Source: PubMed Central journal article supplement — Stem Cell Reports. 2021 Apr 1;16(4):968–84. doi: 10.1016/j.stemcr.2021.03.008 (PMC8072132; doi:10.1016/j.stemcr.2021.03.008), 2021-04-01
Supplement: mmc1.pdf [file mmc1.pdf]

**Stem Cell Reports, Volume 16**

**Supplemental Information**

**Molecular Profiling Reveals Involvement of ESCO2 in Intermediate Progenitor Cell Maintenance in the Developing Mouse Cortex**

**Pauline Antonie Ulmke, M. Sadman Sakib, Peter Ditte, Godwin Sokpor, Cemil Kerimoglu, Linh Pham, Yuanbin Xie, Xiaoyi Mao, Joachim Rosenbusch, Ulrike Teichmann, Huu Phuc Nguyen, Andre Fischer, Gregor Eichele, Jochen F. Staiger, and Tran Tuoc**

SUPPLEMENTAL DATA

Figure S1

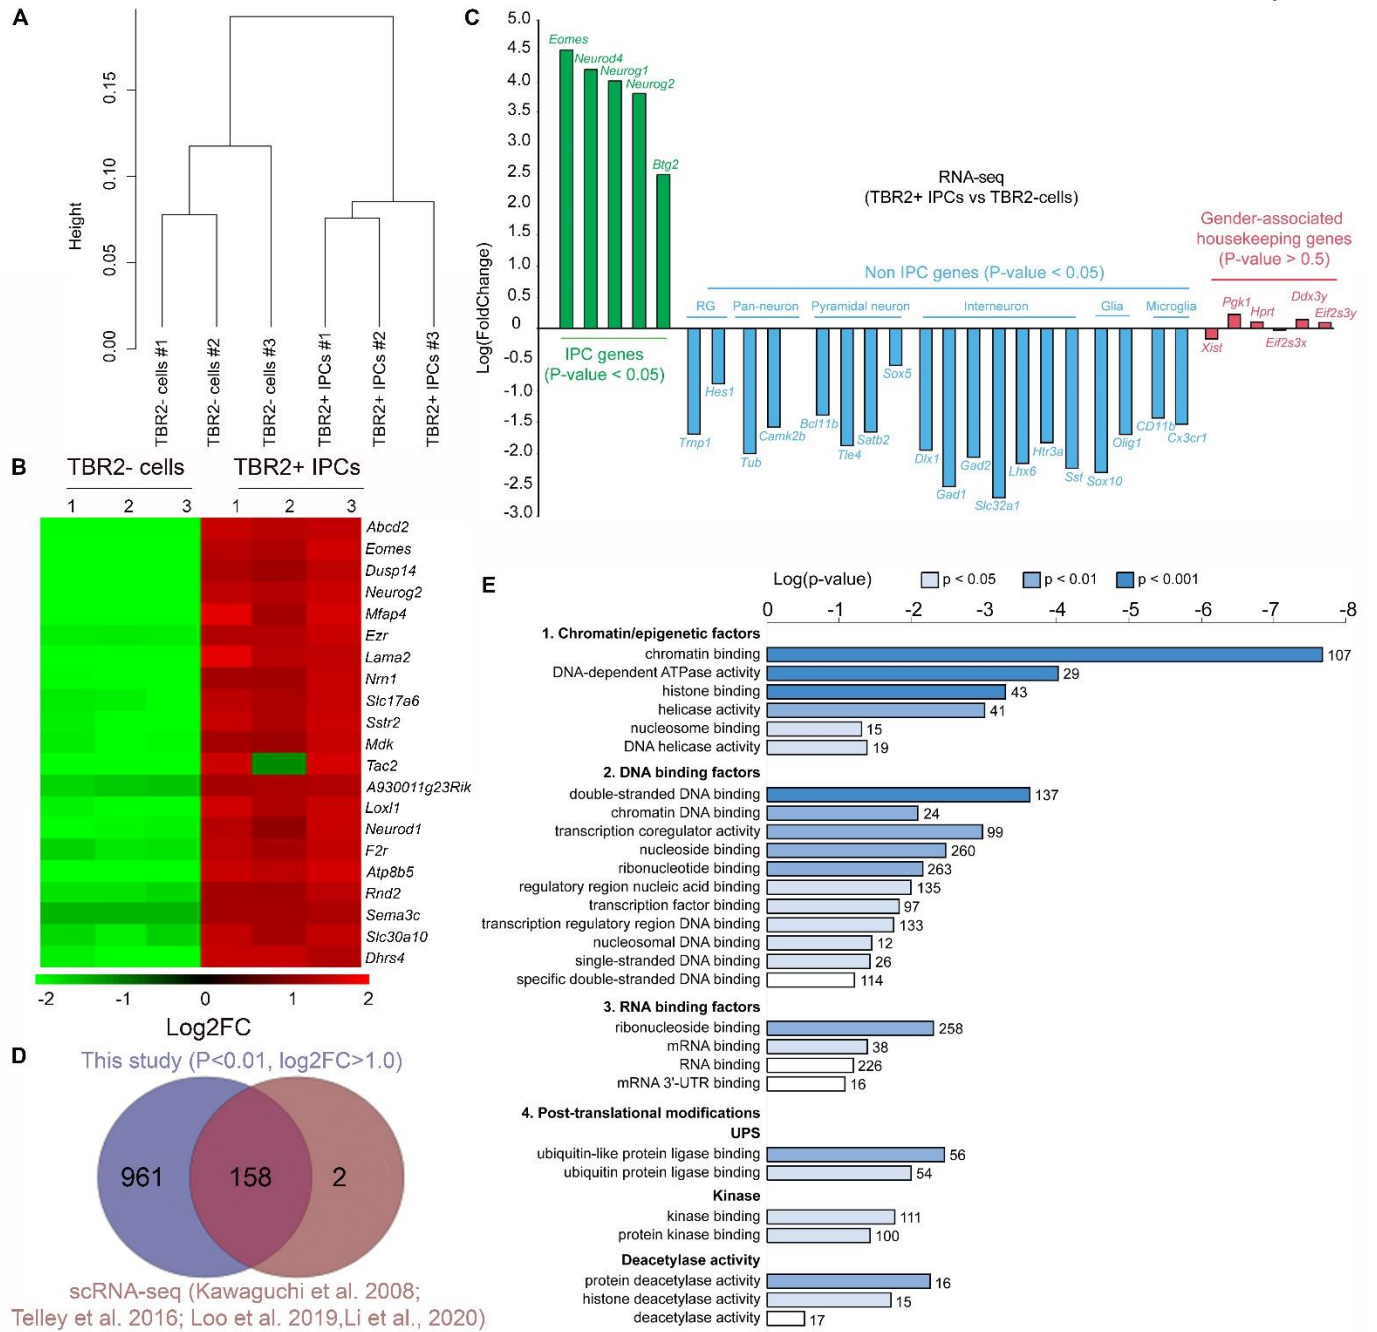

**Figure S1 (related to figure 1). RNA-seq analysis of mouse TBR2+ IPCs and TBR2- cells.** (A) Cluster dendrogram analysis of RNA-seq for TBR2+ and TBR2- sorted cell samples. (B) Heatmap showing the top 20 genes with high expression (enriched/upregulated) in TBR2+ IPCs and low expression in TBR2- cells. (C) Bar graph showing expression of selected IPC (in green), non-IPC (in blue) and gender-associated housekeeping genes (in red) in IPCs (TBR2+) and non IPCs (TBR2-) in the E16.5 mouse cortex. (D) An indication of the increased number of IPC-enriched genes identified in our study compared with previous studies performed at the IP single cell level. (E) Bar graph showing the molecular pathway analysis in TBR2+ IPCs and the number of genes belonging to each category of pathway.

Figure S2

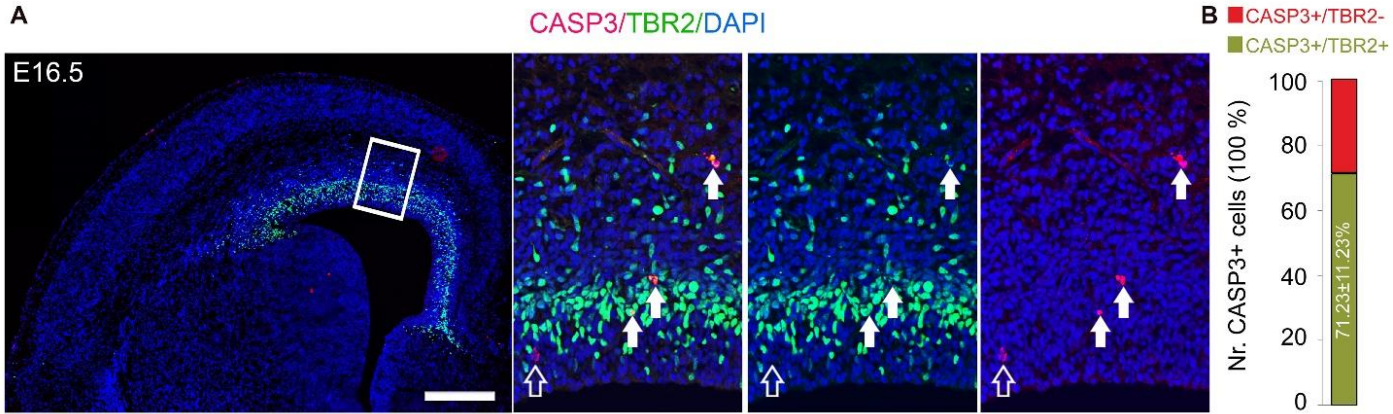

**Figure S2 (related to figure 3). TBR2+ IPCs in mouse display prominent apoptotic activity.** (A) Immunohistochemical micrographs showing an overview of E16.5 mouse cortex and highly magnified germinal zone stained with TBR2 and CASP3 antibodies. The zoomed area is indicated with white inserted box. Filled arrows point to TBR2+ IPCs undergoing apoptosis whereas empty arrow indicates apoptotic activity in a TBR2- cell. Counterstaining was done with DAPI. (B) Bar graph showing the proportion of TBR2+ and TBR2- cells undergoing apoptosis. Experimental replicates (n) = 6 (B). Scale bar = 100  $\mu$ m.

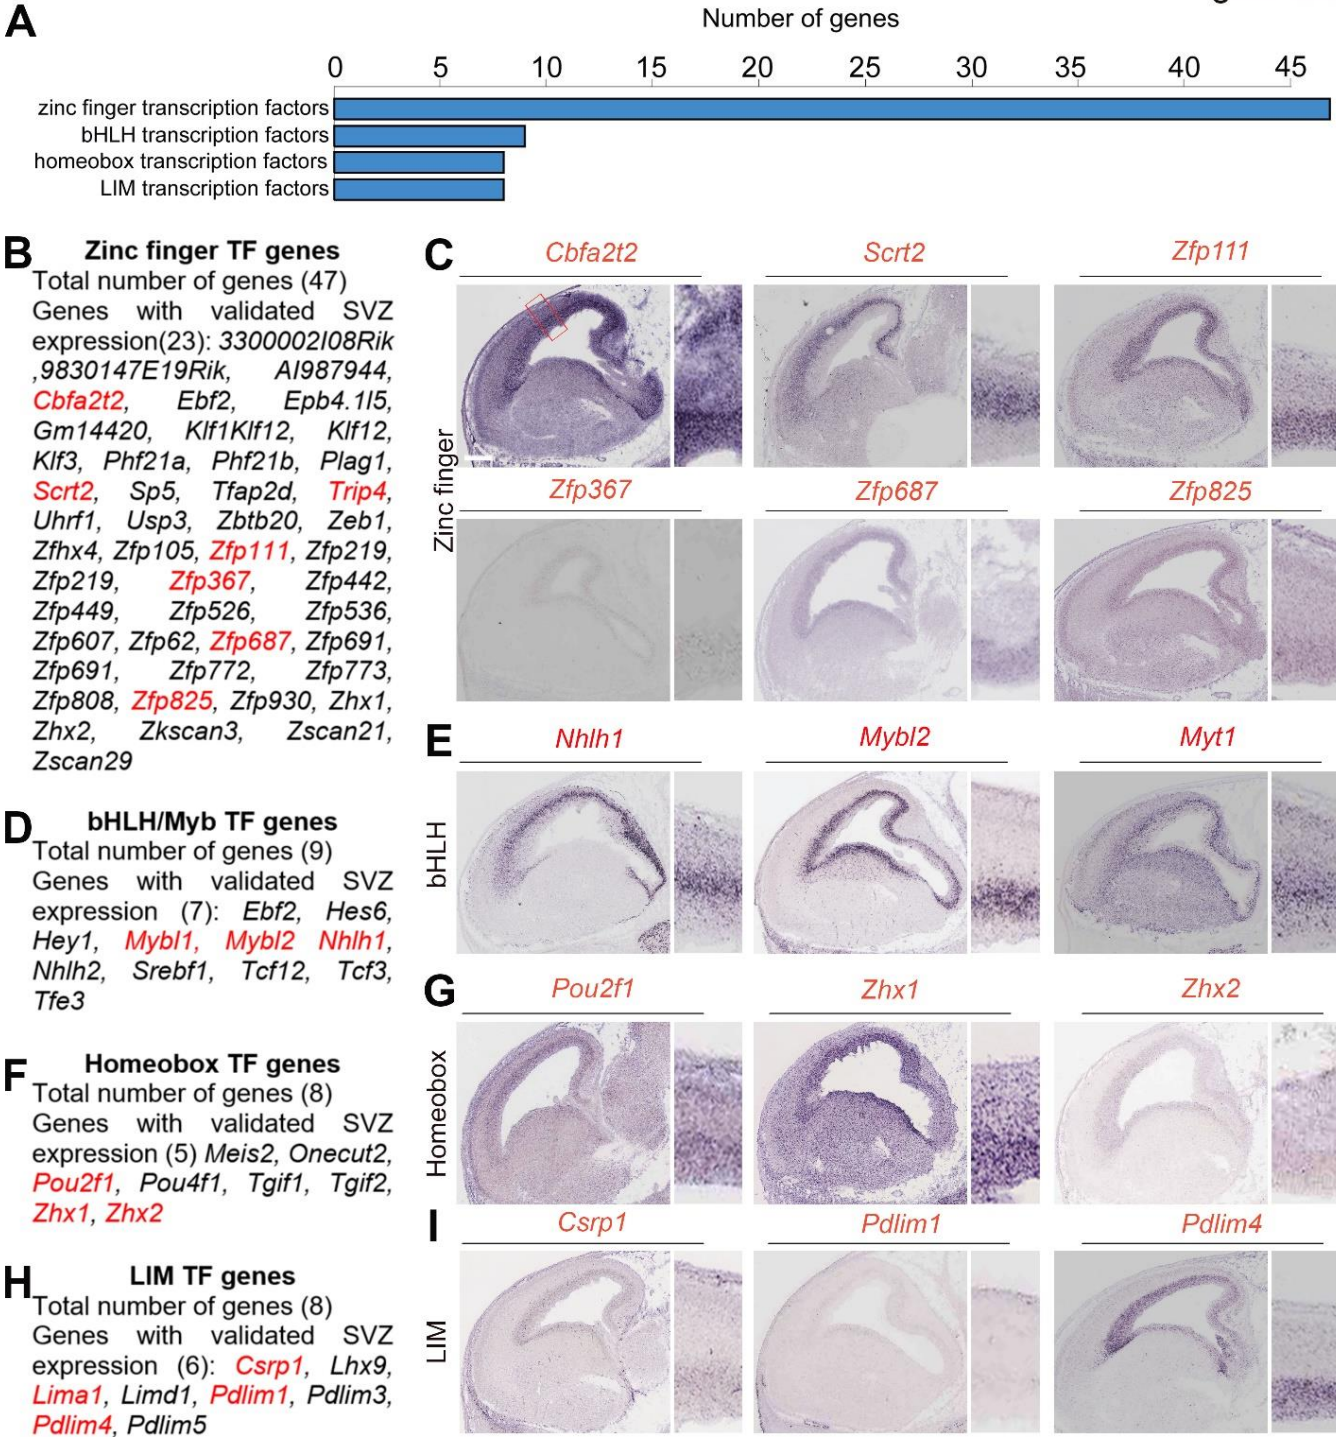

**Figure S3 (related to figure 4). Enrichment of transcription factor genes in TBR2+ IPCs.** (A) Bar graph showing the number of genes in IPCs under the indicated classes of transcription factor. (B, D, F, H) Categories of transcription factors with corresponding list of newly identified IPC-enriched genes. (C, E, G, I) Respective micrographs showing *in situ* hybridization of examples of the identified transcription factor genes (highlighted red in the adjoining gene list) with expression endowment in the developing mouse cortical subventricular zone. Magnified cortical region is shown with red box in (C). Scale bar = 100  $\mu\text{m}$ .

Figure S4

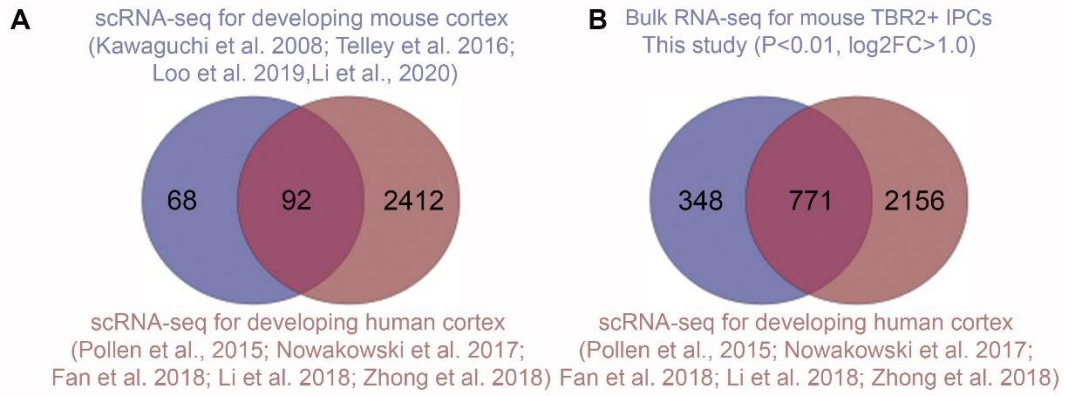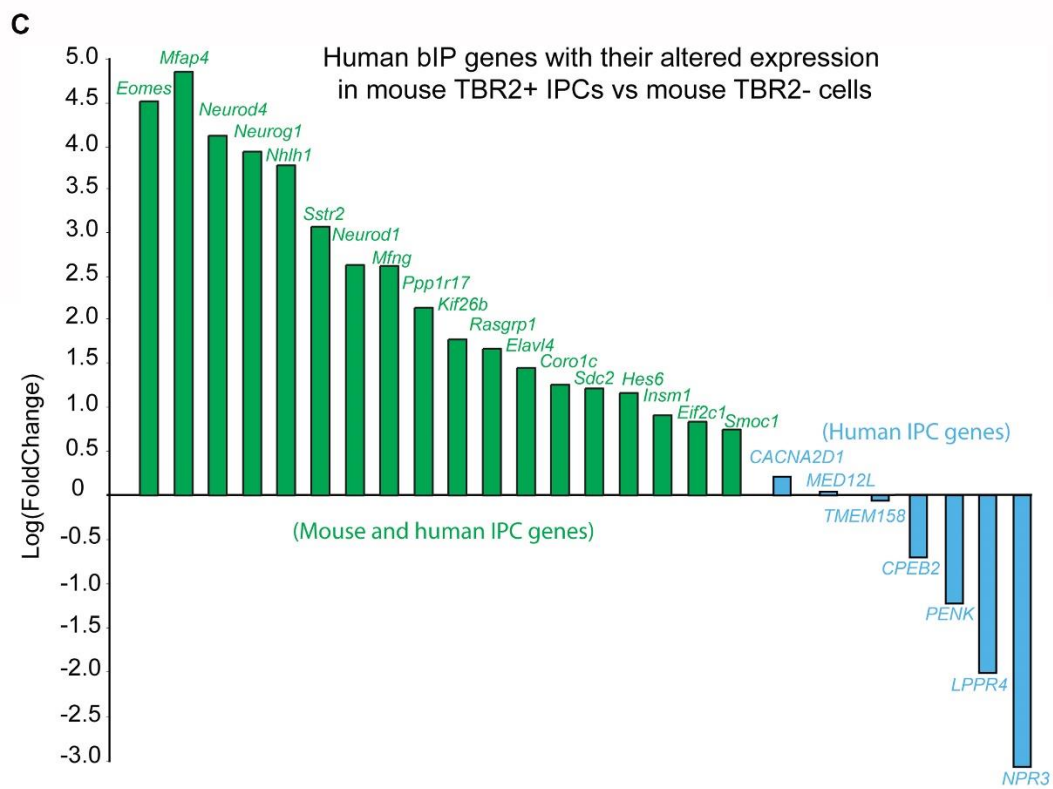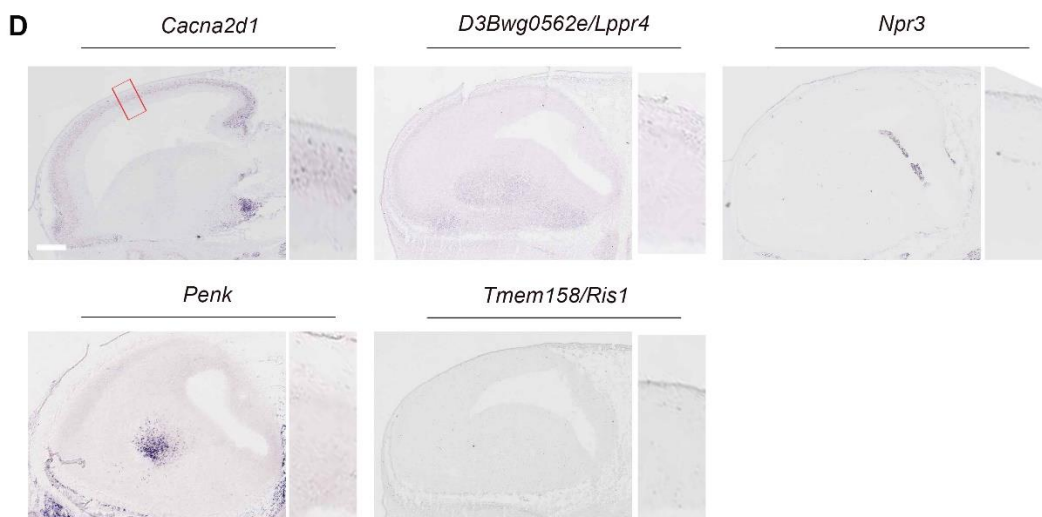



**Figure S4 (related to figure 5). Many human bIP genes are upregulated in mouse TBR2+ IPCs while others are downregulated or absent.** (A, B) Overlap between the number of human IPC genes from scRNA-seq analysis of the human developing cortex (Fan et al., 2018; Li et al., 2018; Nowakowski et al., 2017; Pollen et al., 2015; Zhong et al., 2018) and number of mouse IPC genes, which was recently identified by scRNA-seq analysis (Kawaguchi et al., 2008; Li et al., 2020; Loo et al., 2019; Telley et al., 2016) (A), and by bulk RNA-seq (B, this study). (C) Bar graph showing both upregulated (enriched) and downregulated human bIP genes in TBR2+ IPCs compared with TBR2- cells in mouse cortex. (D) *In situ* hybridization micrographs showing the E14.5 mouse cortex riboprobed for the indicated human bIP genes. Magnified cortical region is shown with red box. Scale bar = 100  $\mu$ m.

Figure S5

**A** RNA-seq  
(IPCs vs TBR2- cells)

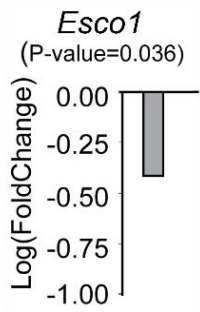

**B** scRNA-seq  
(Developing mouse cortex)

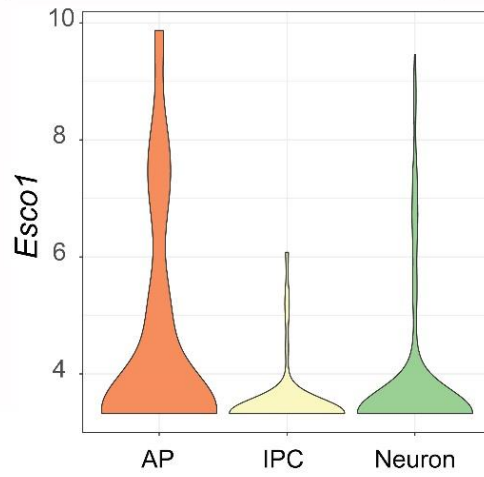

**C** ISH  
(E14.5)

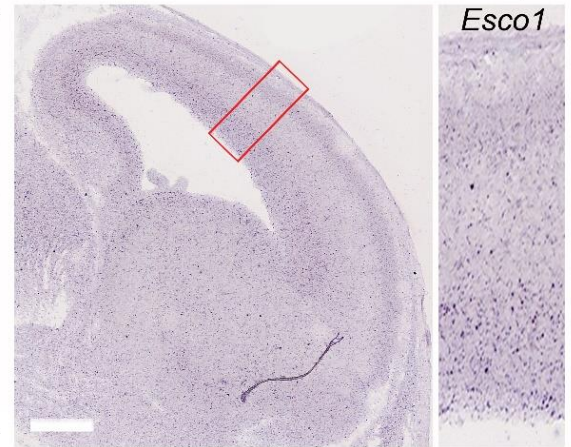

**D** *Esco2*  
(P-value=2.78E-10)

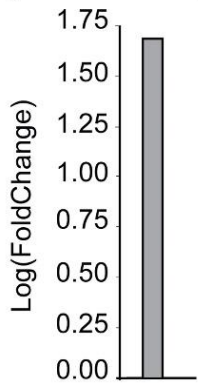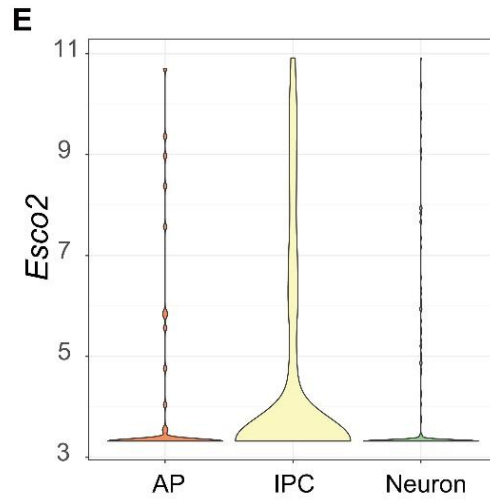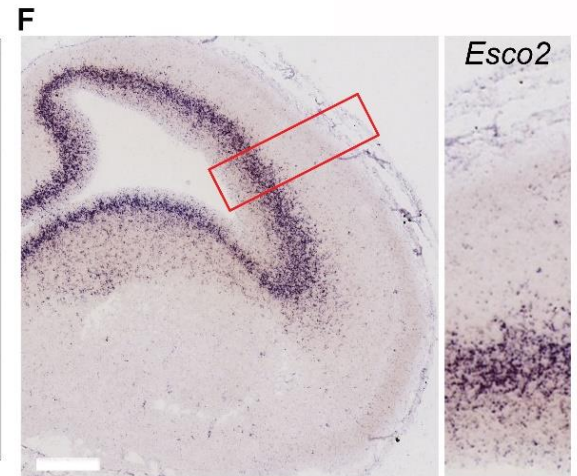

**Figure S5 (related to figure 6). Expression of ESCO1 and ESCO2 in the developing mouse cortex.** (A–F) Expression of ESCO1 (A–C) and ESCO2 (D–F) were evaluated by RNA-seq with TBR2+ and TBR2- samples (A, D), single-cell (sc)RNA-seq (B, E), and ISH (C, F). (A, D) Bar graph indicating significant differential expression of ESCO1 (A) and ESCO2 (D) in TBR2+ IPCs compared with TBR2- cells in RNA-seq analysis. (B, E) Expression of *Esco1* (B) *Esco2* (E) based on a published single-cell scRNA-seq dataset of the developing mouse cortex (Telley et al., 2016). The graph-plots were generated using the Seurat package of R (Macosko et al., 2015) (<http://genebrowser.unige.ch/science2016/>). (C, F) Micrograph of *in situ* hybridization (ISH) staining showing prominence of *Esco1* (C) and *Esco2* (F) expression in VZ and SVZ of E14.5 mouse cortex, respectively. Magnified cortical region is shown with red box. Note that in contrast to a highly-enriched expression of *Esco1* in RGCs in VZ, expression of *Esco2* is mostly restricted in IPCs in SVZ. Abbreviations: RGC (Radial glial progenitor cell), IPC (Intermediate progenitor cell). Scale bar = 100  $\mu$ m.

Figure S6

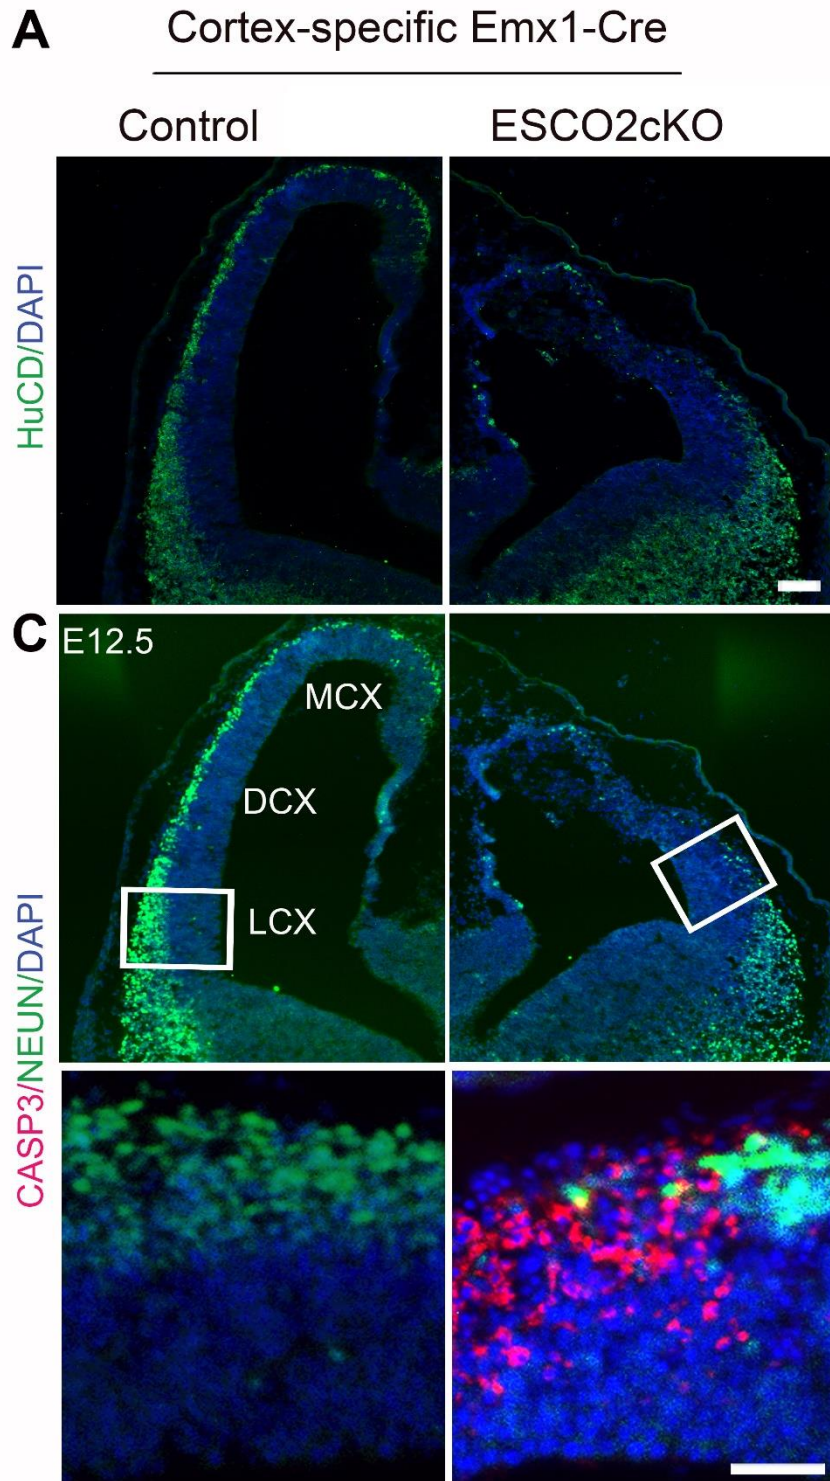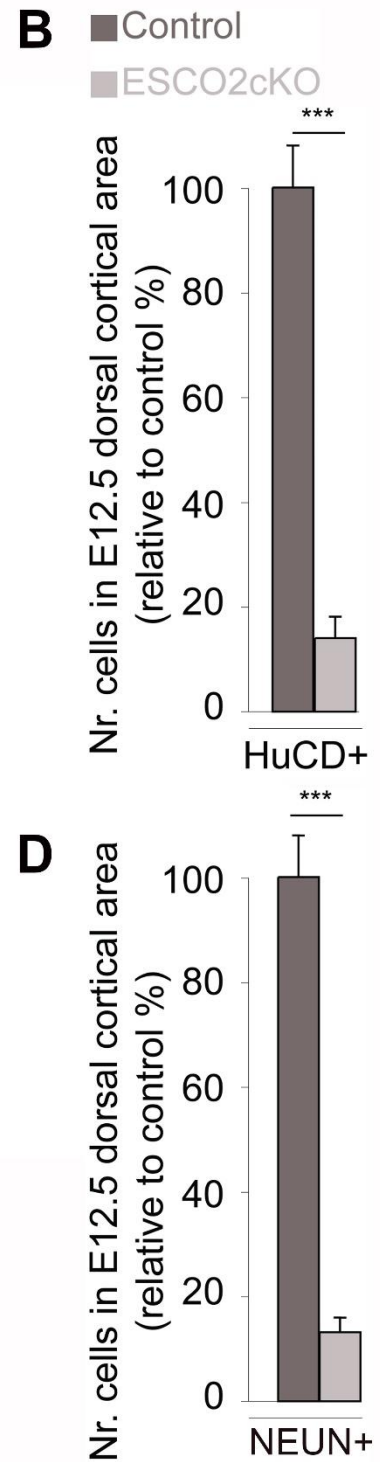

**Figure S6 (related to figure 7). Deletion of ESCO2 in developing cortex causes depletion of post-mitotic neurons via apoptosis.** (A, C) Immunohistochemical micrographs showing staining of the E12.5 mouse cortex with the antibodies HuCD and NeuN (pan-neuronal markers), and CASP3 to mark post-mitotic neurons undergoing apoptotic cell death. (B, D) Bar charts showing quantification of the number of HuCD+ and NeuN+ cells in the lateral aspect of the E12.5 cortex (marked with white box). The medial (MCX), dorsal (DCX), and lateral (LCX) cortical areas are indicated. \*\*\*  $p$ -value < 0.001, Experimental replicates (n) = 4 (B, D). Scale bar = 200  $\mu$ m (A), 50  $\mu$ m (C, lower panel).

- **Table S1 (related to figure 1).** Differential gene expression between TBR2+ IPCs and TBR2- cells (as a Supplemental Spreadsheet).
- **Table S2 (related to figure 1).** Selected gene ontology categories significantly enriched for TBR2+ IPC genes compared with TBR2- cell genes (as a supplemental spreadsheet).
- **Table S3 (related to figure 1).** List of validated IPC genes with their restricted expression in SVZ (as a Supplemental Spreadsheet).
- **Table S4 (related to figure 2).** List of cell cycle and chromosome segregation -related gene enriched in TBR2+ IPCs (as a Supplemental Spreadsheet).
- **Table S5 (related to figure 3).** List of apoptosis-related gene enriched in TBR2+ IPCs (as a Supplemental Spreadsheet).
- **Table S6 (related to figure 4).** List of TF-, chromatin remodeling-, epigenetic-, and lncRNA related genes enriched in TBR2+ IPCs (as a Supplemental Spreadsheet).
- **Table S7 (related to figure 5).** List of microcephaly-linked gene enriched in TBR2+ (as a Supplemental Spreadsheet).
- **Table S8 (related to figures 1, 6, 7, S2, S6).** Statistical analyses (as a Supplemental Spreadsheet).

## **SUPPLEMENTAL EXPERIMENTAL PROCEDURES.**

### **Plasmids**

Plasmids used in this study: CAG-GFP-IRES-CRE (Zhao et al. 2006) from Addgene.

### **Antibodies**

The following polyclonal (pAb) and monoclonal (mAb) primary antibodies used in this study were obtained from the indicated commercial sources: CASP3 rabbit pAb (1:100; Cell Signaling), ESCO2 (Whelan et al., 2012), GFP chick pAb (1:400; Abcam), HuCD mouse mAb (1:20; Invitrogen), NEUN mouse mAb (1:200, Chemicon), PAX6 mouse mAb (1:100; Developmental Studies Hybridoma Bank), PAX6 rabbit pAb (1:200; Covance), TBR2 rabbit pAb (1:200; Abcam), TBR2 rat 923 mAb (1:200; eBioscience).

Secondary antibodies used were Alexa 488-, Alexa 568-, Alexa 594- and Alexa 647-conjugated IgG (various species, 1:400; Molecular Probes).

### **Functional enrichment analysis of IPC genes**

The lists of IPC genes ( $p\text{-Value} < 0.01$ ,  $\log_2\text{FoldChange} > 1.0$ ) were uploaded to the DAVID functional annotation tool (<https://david.ncifcrf.gov/>). Then, representative enriched biological functional terms were manually selected. To perform the Gene Set Enrichment Analysis (GSEA) analysis, the list of upregulated genes was uploaded to GSEA. Using FDR  $q\text{-value} < 0.05$  as a cut-off generated the enriched biological and cellular component terms. The Fisher's exact test was applied to identify the terms showing a statistically significant difference for the upregulated genes.

### **Identification of IPC-enriched lncRNAs**

The lists of IPC genes ( $p\text{-Value} < 0.01$ ,  $\log_2\text{FoldChange} > 1.0$ ) were uploaded to the MGI gene nomenclature analysis tool (<http://www.informatics.jax.org/batch>). List of lncRNAs protein-encoding genes was extracted from each other.

## **Protein-Protein interaction network**

The combined list of IPC-enriched genes encoding for TFs (chromatin re modeling and epigenetic factors, Fig. 4J) was uploaded to the STRING database (<http://string-db.org/>). The protein-protein interactions from STRING were visualized by Cytoscape (<https://cytoscape.org/>; version: 3.3.0).

## **SUPPLEMENTAL DISCUSSION**

### **Prominence of cell cycle-related factors in IPCs**

Further unanswered questions that need to be addressed to increase our understanding of ICP cell biology include (1) the reasons behind shorter S-phase and longer G1-phase, and total length of cell cycle in IPCs than in RGCs, and (2) what factors drive the proliferation of some IPCs in cell cycle? In developing cortex, the length of G1 is increased in neurogenic progenitor cells compared with proliferative progenitors (Caviness et al., 2003; Dehay and Kennedy, 2007; Lukaszewicz et al., 2005; Salomoni and Calegari, 2010). As such, basal progenitors, including IPCs, are known to display a more extended G1 phase than RGCs (Calegari et al., 2005; Salomoni and Calegari, 2010). The increased G1 phase may support the more differentiative capacity of IPCs compared with RGCs, thus likely promoting IPC fate (Dehay and Kennedy, 2007; Lange et al., 2009). Indeed, functional manipulation of G1 length was shown to have effects that either support (i) IPC genesis leading to neurogenic division and premature neurogenesis (Calegari et al., 2005) or (ii) increased proliferative divisions, resulting in progenitor pool expansion, which manifests in cortical layer phenotypes later in development (Lange et al., 2009; Pilaz et al., 2009). Of note, we found a high expression of genes encoding for CDKs (*Cdk2*, *Cdk4*) with their regulator proteins (CCND1, CCND2, CCNE1, CCNE2), which drive the G1 phase of cycling IPCs. Hence, it is worth to examine the proliferation capacity of IPCs, in which the expression of these G1-phase factors is specifically manipulated.

### **Identification of new IPC-specific transcription factors**

An intriguing molecular difference between the TBR2+ IPCs and the TBR2- cells in the developing mouse cortex is the differential expression of genes, which encode for different TF families (Table S5).

The zinc finger TFs form the largest protein family, having a wide range of molecular functions, and are involved in the development and differentiation of several cell lineages (Cassandri et al., 2017). Expression of many genes encoding for this TF family is enriched in IPCs. The role of the zinc finger proteins identified in this study in neurogenesis are largely unknown, except for that reported for the function of Uhrf1 in adult neurogenesis (Blanchart et al., 2018; Murao et al., 2019).

The second largest family of TFs is the bHLH TFs, which play key roles in various developmental processes in organisms from yeast to humans (Jones, 2004). Class I bHLH proteins are ubiquitously expressed, whereas class II bHLH proteins are tissue-specific. The nervous system-specific bHLH factors can further be classified into proneural and neural differentiation genes (Dennis et al., 2019). Two closely-related nescient helix loop helix 1 (*Nhlh1/bHLHa35*) and 2 (*Nhlh2/bHLHa34*) genes belong to the neural differentiation bHLH/NscL subfamily genes (Dennis et al., 2019). In chicken, misexpression of *Nhlh1* leads to an abnormal brain structure with an underdeveloped cerebellum and a larger tectum caused by changes in cell proliferation (Li et al., 1999). *Nhlh1*-deficient mice exhibit a predisposition to arrhythmia leading to an early death due to autonomic nervous system dysfunction (Cogliati et al., 2002). The phenotype was more severe when *Nhlh1*-knockout mice were also heterozygous for *Nhlh2*. The specific and high expression of *Nhlh1* and *Nhlh2* in IPCs (Table. S5) suggests that the two factors act together to control the IPC differentiation. Expression of other bHLH TFs, including *Hes6/bHLHb41*, *Tcf3/bHLHb21*, *Tcf12/bHLHb20*, *Hey1/bHLHb31*, and *Ebf2*, *Srebf1/bHLHd1* were found to be enriched in IPCs. Among them, *Hes6*, *Tcf3*, *Tcf12*, *Hey1* and *Ebf2* were reported to be involved in neural development (Chuang et al., 2011; Gribble et al., 2009; Methot et al., 2013; Nam et al., 2016; Sakamoto et al., 2003; Uittenbogaard and Chiaramello, 2002; Yang et al., 2015). For *Srebf1*, no studies have yet been published on its role in neural development, albeit associations with Schizophrenia and Parkinson's disease have been reported, making a future investigation into its role in brain development even more interesting (Le Hellard et al., 2010; Lou et al., 2019; Yang et al., 2016).



The homeobox TFs were also found to be highly expressed in IPCs. Homeobox genes are important for the embryonic development of diverse animals, and are often comparatively analyzed to investigate evolution of animal development (Holland et al., 2007). Our investigation of genes enriched in IPC revealed three transcription factors that belong to the homeobox gene family. For two of the homeobox genes enriched in IPC, Meis homeobox 2 (*Meis2*) and POU domain, class 4, transcription factor 1 (*Pou4f1*, also called *Brn3a*), a role for neural development has already been described. MEIS2 has been described as a regulator of dorsal midbrain development interacting with the paired-box transcription factors PAX3 and PAX7 (Agoston et al., 2012). In humans, *MEIS2* mutations can cause intellectual disability (Douglas et al., 2018; Giliberti et al., 2019; Louw et al., 2015). In the developing nervous system, *Pou4f1* was shown to be essential for the generation of dorsal root ganglia sensory neurons and the regulation of sensory afferent projections (Zou et al., 2012). The other homeobox gene is the one cut domain family member 2 (*Onecut2*), which is well known as a master regulator in cancer (Lu et al., 2018; Rotinen et al., 2018). Function of ONECUT2 in brain development has not yet been described, however, *Onecut2* overexpression was shown to induce a neuron-like morphology and neuronal gene expression in fibroblasts making its role in neural development plausible (van der Raadt et al., 2019).

Another group of TF genes found to be enriched in IPC lineage is the myeloblastosis oncogene-like (Myb-like) transcription factor. The transcription factor MYBL1 (also called A-MYB) is known as a master regulator of meiosis (Bolcun-Filas et al., 2011), and in mice, it plays a vital role in spermatogenesis and mammary gland development (Toscani et al., 1997). Although *Mybl1* expression in neuronal progenitor cells has already been described (Trauth et al., 1994), its specific role in brain development is far from clear. Similarly, another Myb-like transcription factor, named MYBL2 or B-MYB was found to be enriched in IPC. MYBL2 is involved in cell proliferation and survival, however, these roles have been investigated mainly in cancer research and a possible function in neurogenesis has not been determined so far (Chen and Chen, 2018; Musa et al., 2017).

Altogether, our investigation of genes specific to IPCs revealed the expression of many transcription factors that were previously not known and, thus, are putative genetic

determinants of this cohort of neuronal progenitor cell type. Understanding the function of these IPC-enriched TFs would not only shed light on the mechanisms of cortical development, but also provide suggestions for ways to generate this cell type by direct reprogramming from other cell lineages.

### **Mutation of IPC-enriched genes is implicated in human neurodevelopmental disorders and neuropsychiatric diseases**

The single-cell transcriptomic analysis of human developing cortex has identified a set of IPC genes (Fan et al., 2018; Li et al., 2018; Nowakowski et al., 2017; Pollen et al., 2015; Zhong et al., 2018). As part of further investigations, we compared in silico expression of such human IPC genes with our identified mouse IPC transcriptome to identify the developmental and evolutionary origin of the transcriptional signature of IPC cells. Our data suggest the existence of both conserved and non-conserved transcriptional signatures of IPCs in mammalian evolution. Consistent with this line of evidence, previous studies have shown that expression of TBR2 was found specifically in IPCs in lissencephalic rodent brain (Englund et al., 2005). In gyrencephalic ferret or primates, TBR2 labeled IPCs, and almost half of SOX2+, PAX6+ bRGC population (Betz et al., 2013; Fietz et al., 2010; Florio and Huttner, 2014; Hansen et al., 2010; Turrero Garcia et al., 2016). Furthermore, in rodent cortex, IPCs are predominately-neurogenic progenitors. However, in gyrencephalic species, IPCs are capable of self-amplification through symmetric proliferative divisions before their terminal division to generate neurons (Florio and Huttner, 2014; Lui et al., 2011). Beyond simply marking IPCs as transient progenitor cell type, future studies may have to relate and delve into the heterogeneity in the molecular milieu of IPCs in different species to afford elucidation of their contributions to cortical morphogenesis.

Advances in genetics and genomics studies in recent times have made it possible to identify many genetic coding and non-coding variants that cause neurodevelopmental disorders (D'Gama and Walsh, 2018; Hu et al., 2014; Juric-Sekhar and Hevner, 2019), with increased risk of neuropsychiatric disturbances (Sestan and State, 2018; Sullivan and Geschwind, 2019). Although we now have better insights into the genetic architecture

of neuropsychiatric perturbations, we still lack a comprehensive description of the underlying molecular and cellular mechanisms, mainly because of the heterogeneity of risk loci, and the involvement of multiple cell types and brain regions. Therefore, knowledge of the regulatory networks and the spatiotemporal distribution of these networks in the brain, is essential for elucidating which cell types are relevant in the etiology and possible treatment of these neurodevelopment- and neuropsychiatry-related disorders. Moreover, the clarification of the mechanistic underpinnings of any given neurological disorder also requires detailed understanding of the developmental events that are disrupted in the course of the disease, non-genic causatives (environmental or epigenetic) of the anomalies, and dissection of the eventual phenotype.

Gene co-expression analyses have also revealed that the developing human (Kang et al., 2011; Miller et al., 2014; Pletikos et al., 2014) or mouse (Loo et al., 2019) brain transcriptome can be organized into distinct co-expression networks with often prominent spatiotemporal patterns, and enriched for distinct biological functions. By probing the transcriptome of mouse IPCs and performing further analysis in the form of phenotype association categorization, we found strong connection between the identified IPC genes and known human neurodevelopmental disorders (Fig. 5). This can be explained by the essential role of IPCs in cortical development. A great proportion of cortical neurons can be traced to IPCs. IPC-derived neurons predominately form the upper cortical layers and their axons constitute the large interhemispheric commissural system (i.e., the corpus callosum). Cortical expansion and evolutionary changes have been attributed to the tremendous neurogenic output of TBR2-expressing IPCs and their diversity, especially in human. It is mainly for these reasons that disruption in the production of IPCs can lead to a wide range of cortical malformations and diverse neurological perturbations in the mammalian cortex. Our data thus suggest that disease-linked mutations of IPC genes might form robust groupings based on their GO profiles. These diseases clearly link to neurodevelopmental defects, e.g. cortical size-associated disorders (microcephaly, macrocephaly, and abnormal cortical gyration), corpus callosum defects (dysplastic, agenesis, aplasia, hypoplasia of corpus callosum, and abnormality of the cerebral white matter), and neurological deficits (intellectual disability, psychomotor developmental delay, schizophrenia, autism, and epilepsy).

Despite the recent great interest in elucidating the principles underlying the IPC-mediated evolutionary expansion of the neocortex and the consequence of related dysregulation, relatively less attention is accorded to dissecting disease-linked mutations of IPC genes to elucidate the pathophysiology of the attendant neurological disorder. By employing mouse model for the novel IPC gene *Esco2*, we were able to identify that IPCs may centrally rely on ESCO2 for survival and maintenance of their pool in the developing cortex. The absence of ESCO2, which is rather needed for the correct segregation of chromatids and therefore the genetic material into the progenies of dividing IPCs, may have triggered the massive apoptosis of the resultant ESCO2-deficient IPCs and the resultant overt cortical dysgenesis. Interestingly, *Esco2* mutations in human have been linked to neurological phenotypes, including microcephaly and cognitive deficits. The said pivotal role played by ESCO2 in IPC genesis and cortical morphogenesis recapitulated similar critical function of TBR2 in brain morphogenesis. Mutations that abolish *Tbr2* expression can cause severe neurodevelopmental abnormalities, including microcephaly, severe motor and cognitive delay, hypotonia, callosal agenesis, polymicrogyria, and cerebellar hypoplasia in rodent (Arnold et al., 2008; Sessa et al., 2008) and human (Baala et al. 2007). For future studies, linkage mapping and/or exome sequencing in human is expected to identify more IPC-related mutations and dysregulated genes associated with aberrant cortical architecture and growth.

To minimize gender bias in sampling for RNA-seq, we altogether used tissue from 15 embryos for 3 replicates. In addition, to examine the relative gender contribution in our samples, we compared the expression of chromosome X (*Xist*, *Pgk1*, *Hprt*, *Eif2s3x*) and chromosome Y (*Ddx3y*, *Eif2s3y*) - located genes, which are known housekeeping genes in the developing forebrain (Dewing et al. 2003; Cheung et al. 2017). The comparison revealed their comparable expression level in samples from TBR2+ IPCs and TBR2- cells (Fig. S1C). The data suggests that TBR2+ and TBR2- cell populations were derived from a similar number of female and male embryos. Nevertheless, the expression pattern of chromosome X/Y-located IPC genes should be validated by either IHC or ISH afore further investigation.

## REFERENCES

Agoston, Z., Li, N., Haslinger, A., Wizenmann, A., and Schulte, D. (2012). Genetic and physical interaction of Meis2, Pax3 and Pax7 during dorsal midbrain development. *BMC Dev Biol* 12, 10.

Arnold, S.J., Huang, G.J., Cheung, A.F., Era, T., Nishikawa, S., Bikoff, E.K., Molnar, Z., Robertson, E.J., and Groszer, M. (2008). The T-box transcription factor Eomes/Tbr2 regulates neurogenesis in the cortical subventricular zone. *Genes Dev* 22, 2479-2484.

Betizeau, M., Cortay, V., Patti, D., Pfister, S., Gautier, E., Bellemin-Menard, A., Afanassieff, M., Huissoud, C., Douglas, R.J., Kennedy, H., *et al.* (2013). Precursor diversity and complexity of lineage relationships in the outer subventricular zone of the primate. *Neuron* 80, 442-457.

Blanchart, A., Navis, A.C., Assaife-Lopes, N., Usoskin, D., Aranda, S., Sontheimer, J., and Ernfors, P. (2018). UHRF1 Licensed Self-Renewal of Active Adult Neural Stem Cells. *Stem Cells* 36, 1736-1751.

Bolcun-Filas, E., Bannister, L.A., Barash, A., Schimenti, K.J., Hartford, S.A., Eppig, J.J., Handel, M.A., Shen, L., and Schimenti, J.C. (2011). A-MYB (MYBL1) transcription factor is a master regulator of male meiosis. *Development* 138, 3319-3330.

Calegari, F., Haubensak, W., Haffner, C., and Huttner, W.B. (2005). Selective lengthening of the cell cycle in the neurogenic subpopulation of neural progenitor cells during mouse brain development. *J Neurosci* 25, 6533-6538.

Cassandri, M., Smirnov, A., Novelli, F., Pitolli, C., Agostini, M., Malewicz, M., Melino, G., and Raschella, G. (2017). Zinc-finger proteins in health and disease. *Cell Death Discov* 3, 17071.

Caviness, V.S., Jr., Goto, T., Tarui, T., Takahashi, T., Bhide, P.G., and Nowakowski, R.S. (2003). Cell output, cell cycle duration and neuronal specification: a model of integrated mechanisms of the neocortical proliferative process. *Cereb Cortex* 13, 592-598.

Chen, J., and Chen, X. (2018). MYBL2 Is Targeted by miR-143-3p and Regulates Breast Cancer Cell Proliferation and Apoptosis. *Oncol Res* 26, 913-922.

Chuang, S.M., Wang, Y., Wang, Q., Liu, K.M., and Shen, Q. (2011). Ebf2 marks early cortical neurogenesis and regulates the generation of cajal-retzius neurons in the developing cerebral cortex. *Dev Neurosci* 33, 479-493.

Cogliati, T., Good, D.J., Haigney, M., Delgado-Romero, P., Eckhaus, M.A., Koch, W.J., and Kirsch, I.R. (2002). Predisposition to arrhythmia and autonomic dysfunction in Nhlh1-deficient mice. *Mol Cell Biol* 22, 4977-4983.

D'Gama, A.M., and Walsh, C.A. (2018). Somatic mosaicism and neurodevelopmental disease. *Nat Neurosci* 21, 1504-1514.

Dehay, C., and Kennedy, H. (2007). Cell-cycle control and cortical development. *Nat Rev Neurosci* 8, 438-450.

Dennis, D.J., Han, S., and Schuurmans, C. (2019). bHLH transcription factors in neural development, disease, and reprogramming. *Brain Res* 1705, 48-65.

Douglas, G., Cho, M.T., Telegrafi, A., Winter, S., Carmichael, J., Zackai, E.H., Deardorff, M.A., Harr, M., Williams, L., Psychogios, A., *et al.* (2018). De novo missense variants in MEIS2 recapitulate the microdeletion phenotype of cardiac and palate abnormalities, developmental delay, intellectual disability and dysmorphic features. *Am J Med Genet A* 176, 1845-1851.

Englund, C., Fink, A., Lau, C., Pham, D., Daza, R.A., Bulfone, A., Kowalczyk, T., and Hevner, R.F. (2005). Pax6, Tbr2, and Tbr1 are expressed sequentially by radial glia, intermediate progenitor cells, and postmitotic neurons in developing neocortex. *J Neurosci* 25, 247-251.

Fan, X., Dong, J., Zhong, S., Wei, Y., Wu, Q., Yan, L., Yong, J., Sun, L., Wang, X., Zhao, Y., *et al.* (2018). Spatial transcriptomic survey of human embryonic cerebral cortex by single-cell RNA-seq analysis. *Cell research* 28, 730-745.

Fietz, S.A., Kelava, I., Vogt, J., Wilsch-Brauninger, M., Stenzel, D., Fish, J.L., Corbeil, D., Riehn, A., Distler, W., Nitsch, R., *et al.* (2010). OSVZ progenitors of human and ferret neocortex are epithelial-like and expand by integrin signaling. *Nat Neurosci* *13*, 690-699.

Florio, M., and Huttner, W.B. (2014). Neural progenitors, neurogenesis and the evolution of the neocortex. *Development* *141*, 2182-2194.

Giliberti, A., Curro, A., Papa, F.T., Frullanti, E., Ariani, F., Coriolani, G., Grosso, S., Renieri, A., and Mari, F. (2019). MEIS2 gene is responsible for intellectual disability, cardiac defects and a distinct facial phenotype. *Eur J Med Genet*.

Gribble, S.L., Kim, H.S., Bonner, J., Wang, X., and Dorsky, R.I. (2009). Tcf3 inhibits spinal cord neurogenesis by regulating sox4a expression. *Development* *136*, 781-789.

Hansen, D.V., Lui, J.H., Parker, P.R., and Kriegstein, A.R. (2010). Neurogenic radial glia in the outer subventricular zone of human neocortex. *Nature* *464*, 554-561.

Holland, P.W., Booth, H.A., and Bruford, E.A. (2007). Classification and nomenclature of all human homeobox genes. *BMC Biol* *5*, 47.

Hu, W.F., Chahrour, M.H., and Walsh, C.A. (2014). The diverse genetic landscape of neurodevelopmental disorders. *Annual review of genomics and human genetics* *15*, 195-213.

Jones, S. (2004). An overview of the basic helix-loop-helix proteins. *Genome Biol* *5*, 226.

Juric-Sekhar, G., and Hevner, R.F. (2019). Malformations of Cerebral Cortex Development: Molecules and Mechanisms. *Annu Rev Pathol* *14*, 293-318.

Kang, H.J., Kawasawa, Y.I., Cheng, F., Zhu, Y., Xu, X., Li, M., Sousa, A.M., Pletikos, M., Meyer, K.A., Sedmak, G., *et al.* (2011). Spatio-temporal transcriptome of the human brain. *Nature* *478*, 483-489.

Kawaguchi, A., Ikawa, T., Kasukawa, T., Ueda, H.R., Kurimoto, K., Saitou, M., and Matsuzaki, F. (2008). Single-cell gene profiling defines differential progenitor subclasses in mammalian neurogenesis. *Development* *135*, 3113-3124.

Lange, C., Huttner, W.B., and Calegari, F. (2009). Cdk4/cyclinD1 overexpression in neural stem cells shortens G1, delays neurogenesis, and promotes the generation and expansion of basal progenitors. *Cell Stem Cell* *5*, 320-331.

Le Hellard, S., Muhleisen, T.W., Djurovic, S., Ferno, J., Ouriaghi, Z., Mattheisen, M., Vasilescu, C., Raeder, M.B., Hansen, T., Strohmaier, J., *et al.* (2010). Polymorphisms in SREBF1 and SREBF2, two antipsychotic-activated transcription factors controlling cellular lipogenesis, are associated with schizophrenia in German and Scandinavian samples. *Mol Psychiatry* *15*, 463-472.

Li, C.M., Yan, R.T., and Wang, S.Z. (1999). Misexpression of a bHLH gene, cNSCL1, results in abnormal brain development. *Dev Dyn* *215*, 238-247.

Li, M., Santpere, G., Imamura Kawasawa, Y., Evgrafov, O.V., Gulden, F.O., Pochareddy, S., Sunkin, S.M., Li, Z., Shin, Y., Zhu, Y., *et al.* (2018). Integrative functional genomic analysis of human brain development and neuropsychiatric risks. *Science* *362*.

Li, Z., Tyler, W.A., Zeldich, E., Santpere Baro, G., Okamoto, M., Gao, T., Li, M., Sestan, N., and Haydar, T.F. (2020). Transcriptional priming as a conserved mechanism of lineage diversification in the developing mouse and human neocortex. *Science advances* *6*.

Loo, L., Simon, J.M., Xing, L., McCoy, E.S., Niehaus, J.K., Guo, J., Anton, E.S., and Zylka, M.J. (2019). Single-cell transcriptomic analysis of mouse neocortical development. *Nat Commun* *10*, 134.

Lou, F., Li, M., Liu, N., Li, X., Ren, Y., and Luo, X. (2019). The polymorphism of SREBF1 gene rs11868035 G/A is associated with susceptibility to Parkinson's disease in a Chinese population. *Int J Neurosci* *129*, 660-665.

Louw, J.J., Corveleyn, A., Jia, Y., Hens, G., Gewillig, M., and Devriendt, K. (2015). MEIS2 involvement in cardiac development, cleft palate, and intellectual disability. *Am J Med Genet A* *167A*, 1142-1146.

Lu, T., Wu, B., Yu, Y., Zhu, W., Zhang, S., Zhang, Y., Guo, J., and Deng, N. (2018). Blockade of ONECUT2 expression in ovarian cancer inhibited tumor cell proliferation, migration, invasion and angiogenesis. *Cancer Sci* *109*, 2221-2234.

Lui, J.H., Hansen, D.V., and Kriegstein, A.R. (2011). Development and evolution of the human neocortex. *Cell* *146*, 18-36.

Lukaszewicz, A., Savatier, P., Cortay, V., Giroud, P., Huissoud, C., Berland, M., Kennedy, H., and Dehay, C. (2005). G1 phase regulation, area-specific cell cycle control, and cytoarchitectonics in the primate cortex. *Neuron* *47*, 353-364.

Macosko, E.Z., Basu, A., Satija, R., Nemes, J., Shekhar, K., Goldman, M., Tirosh, I., Bialas, A.R., Kamitaki, N., Martersteck, E.M., *et al.* (2015). Highly Parallel Genome-wide Expression Profiling of Individual Cells Using Nanoliter Droplets. *Cell* *161*, 1202-1214.

Methot, L., Hermann, R., Tang, Y., Lo, R., Al-Jehani, H., Jhas, S., Svoboda, D., Slack, R.S., Barker, P.A., and Stifani, S. (2013). Interaction and antagonistic roles of NF-kappaB and Hes6 in the regulation of cortical neurogenesis. *Mol Cell Biol* *33*, 2797-2808.

Miller, J.A., Ding, S.L., Sunkin, S.M., Smith, K.A., Ng, L., Szafer, A., Ebbert, A., Riley, Z.L., Royall, J.J., Aiona, K., *et al.* (2014). Transcriptional landscape of the prenatal human brain. *Nature* *508*, 199-206.

Murao, N., Matsubara, S., Matsuda, T., Noguchi, H., Mutoh, T., Mutoh, M., Koseki, H., Namihira, M., and Nakashima, K. (2019). Np95/Uhrfl regulates tumor suppressor gene expression of neural stem/precursor cells, contributing to neurogenesis in the adult mouse brain. *Neurosci Res* *143*, 31-43.

Musa, J., Aynaud, M.M., Mirabeau, O., Delattre, O., and Grunewald, T.G. (2017). MYBL2 (B-Myb): a central regulator of cell proliferation, cell survival and differentiation involved in tumorigenesis. *Cell Death Dis* *8*, e2895.

Nam, S.M., Kim, Y.N., Kim, J.W., Kyeong, D.S., Lee, S.H., Son, Y., Shin, J.H., Kim, J., Yi, S.S., Yoon, Y.S., *et al.* (2016). Hairy and Enhancer of Split 6 (Hes6) Deficiency in Mouse Impairs Neuroblast Differentiation in Dentate Gyrus Without Affecting Cell Proliferation and Integration into Mature Neurons. *Cell Mol Neurobiol* *36*, 57-67.

Nowakowski, T.J., Bhaduri, A., Pollen, A.A., Alvarado, B., Mostajo-Radji, M.A., Di Lullo, E., Haeussler, M., Sandoval-Espinosa, C., Liu, S.J., Velmeshev, D., *et al.* (2017). Spatiotemporal gene expression trajectories reveal developmental hierarchies of the human cortex. *Science* *358*, 1318-1323.

Pilaz, L.J., Patti, D., Marcy, G., Ollier, E., Pfister, S., Douglas, R.J., Betizeau, M., Gautier, E., Cortay, V., Doerflinger, N., *et al.* (2009). Forced G1-phase reduction alters mode of division, neuron number, and laminar phenotype in the cerebral cortex. *Proc Natl Acad Sci U S A* *106*, 21924-21929.

Pletikos, M., Sousa, A.M., Sedmak, G., Meyer, K.A., Zhu, Y., Cheng, F., Li, M., Kawasawa, Y.I., and Sestan, N. (2014). Temporal specification and bilaterality of human neocortical topographic gene expression. *Neuron* *81*, 321-332.

Pollen, A.A., Nowakowski, T.J., Chen, J., Retallack, H., Sandoval-Espinosa, C., Nicholas, C.R., Shuga, J., Liu, S.J., Oldham, M.C., Diaz, A., *et al.* (2015). Molecular identity of human outer radial glia during cortical development. *Cell* *163*, 55-67.

Rotinen, M., You, S., Yang, J., Coetzee, S.G., Reis-Sobreiro, M., Huang, W.C., Huang, F., Pan, X., Yanez, A., Hazelett, D.J., *et al.* (2018). ONECUT2 is a targetable master regulator of lethal prostate cancer that suppresses the androgen axis. *Nat Med* 24, 1887-1898.

Sakamoto, M., Hirata, H., Ohtsuka, T., Bessho, Y., and Kageyama, R. (2003). The basic helix-loop-helix genes *Hesr1/Hey1* and *Hesr2/Hey2* regulate maintenance of neural precursor cells in the brain. *J Biol Chem* 278, 44808-44815.

Salomoni, P., and Calegari, F. (2010). Cell cycle control of mammalian neural stem cells: putting a speed limit on G1. *Trends Cell Biol* 20, 233-243.

Sessa, A., Mao, C.A., Hadjantonakis, A.K., Klein, W.H., and Broccoli, V. (2008). *Tbr2* directs conversion of radial glia into basal precursors and guides neuronal amplification by indirect neurogenesis in the developing neocortex. *Neuron* 60, 56-69.

Sestan, N., and State, M.W. (2018). Lost in Translation: Traversing the Complex Path from Genomics to Therapeutics in Autism Spectrum Disorder. *Neuron* 100, 406-423.

Sullivan, P.F., and Geschwind, D.H. (2019). Defining the Genetic, Genomic, Cellular, and Diagnostic Architectures of Psychiatric Disorders. *Cell* 177, 162-183.

Telley, L., Govindan, S., Prados, J., Stevant, I., Nef, S., Dermitzakis, E., Dayer, A., and Jabaudon, D. (2016). Sequential transcriptional waves direct the differentiation of newborn neurons in the mouse neocortex. *Science* 351, 1443-1446.

Toscani, A., Mettus, R.V., Coupland, R., Simpkins, H., Litvin, J., Orth, J., Hatton, K.S., and Reddy, E.P. (1997). Arrest of spermatogenesis and defective breast development in mice lacking *A-myb*. *Nature* 386, 713-717.

Trauth, K., Mutschler, B., Jenkins, N.A., Gilbert, D.J., Copeland, N.G., and Klempnauer, K.H. (1994). Mouse *A-myb* encodes a trans-activator and is expressed in mitotically active cells of the developing central nervous system, adult testis and B lymphocytes. *EMBO J* 13, 5994-6005.

Turrero Garcia, M., Chang, Y., Arai, Y., and Huttner, W.B. (2016). S-phase duration is the main target of cell cycle regulation in neural progenitors of developing ferret neocortex. *J Comp Neurol* 524, 456-470.

Uittenbogaard, M., and Chiaramello, A. (2002). Expression of the bHLH transcription factor *Tcf12* (*ME1*) gene is linked to the expansion of precursor cell populations during neurogenesis. *Brain Res Gene Expr Patterns* 1, 115-121.

van der Raadt, J., van Gestel, S.H.C., Nadif Kasri, N., and Albers, C.A. (2019). ONECUT transcription factors induce neuronal characteristics and remodel chromatin accessibility. *Nucleic Acids Res* 47, 5587-5602.

Whelan, G., Kreidl, E., Wutz, G., Egner, A., Peters, J.M., and Eichele, G. (2012). Cohesin acetyltransferase *Esco2* is a cell viability factor and is required for cohesion in pericentric heterochromatin. *EMBO J* 31, 71-82.

Yang, L., Chen, J., Li, Y., Wang, Y., Liang, S., Shi, Y., Shi, S., and Xu, Y. (2016). Association between *SCAP* and *SREBF1* gene polymorphisms and metabolic syndrome in schizophrenia patients treated with atypical antipsychotics. *World J Biol Psychiatry* 17, 467-474.

Yang, Q., Liu, S., Yin, M., Yin, Y., Zhou, G., and Zhou, J. (2015). *Ebf2* is required for development of dopamine neurons in the midbrain periaqueductal gray matter of mouse. *Dev Neurobiol* 75, 1282-1294.

Zhong, S., Zhang, S., Fan, X., Wu, Q., Yan, L., Dong, J., Zhang, H., Li, L., Sun, L., Pan, N., *et al.* (2018). A single-cell RNA-seq survey of the developmental landscape of the human prefrontal cortex. *Nature* 555, 524-528.

Zou, M., Li, S., Klein, W.H., and Xiang, M. (2012). *Brn3a/Pou4f1* regulates dorsal root ganglion sensory neuron specification and axonal projection into the spinal cord. *Dev Biol* 364, 114-127.
